# Supplementary material
Source: ML conference proceedings conference paper supplement (https://openaccess.thecvf.com/content/ICCV2025/html/Yuan_ASGS_Single-Domain_Generalizable_ICCV_2025_paper.html)
Supplement: Supplementary file 1 [file Yuan_ASGS_Single-Domain_Generalizable_ICCV_2025_supplemental.pdf]

# ASGS: Single-Domain Generalizable Open-Set Object Detection via Adaptive Subgraph Searching

## Supplementary Material

This document provides more details of our approach and additional experimental results.

### 1. Implementation Details

**Cityscapes  $\rightarrow$  Foggy Cityscapes/BDD100K.** The division between known and unknown classes, as outlined in Table 1, follows four distinct protocols that consider both semantic overlap and instance frequency. These protocols are designed based on the following considerations: 1) In real-world contexts, the semantics of unknown classes may either overlap with or differ from known classes. Recent research in open-set object detection (OSOD) [2, 3, 7] tends to focus on cases of minimal overlap, failing to consider the full spectrum of potential real-world conditions. To address this gap, we evaluate both heterogeneous (non-overlapping) and homogeneous (overlapping) semantics within the SG-OSOD framework, offering a more comprehensive assessment. 2) Instance scale diversity: In real-world environments, the distribution of unknown-class objects varies significantly, with some classes being more prevalent while others are relatively rare. This important aspect is often overlooked in the existing OSOD research. To address this, we rank the classes based on the number of objects and select the three most frequent and three least frequent classes as the known classes, thereby better representing the diversity seen in real-world scenarios.

For evaluation, we follow prior OSOD works [3, 5] by introducing sub-tasks involving 3, 4, and 5 unknown classes. To ensure the accuracy of the evaluation, we exclude images containing objects from unknown classes not included in a particular sub-task.

**Pascal VOC  $\rightarrow$  Clipart1k.** We adopt the unknown class splitting methodology from [4], where the first 10 classes, listed in alphabetical order, are designated as known classes. The remaining classes are then grouped into unknown-class sets  $\Omega_n$  with sizes  $|\Omega_n| \in \{6, 8, 10\}$ , yielding three distinct sub-tasks. To ensure a fair evaluation for each sub-task, we exclude images containing unknown-class objects that do not belong to  $\Omega_n$ . This step prevents unknown-class objects, correctly detected, from being misclassified as false positives.

## 2. Experimental Results

### 2.1. Comparison Methods

For Cityscapes  $\rightarrow$  BDD100K, we present experimental results across different settings (hom-sem, freq-dec and freq-

Table 1. Detailed class splitting settings for Cityscapes  $\rightarrow$  Foggy Cityscapes.

| Settings | Known Classes        | Unknown Classes                                                                               |
|----------|----------------------|-----------------------------------------------------------------------------------------------|
| het-sem  | car, truck, bus      | person, motor, train<br>person, motor, train, bicycle<br>person, motor, train, bicycle, rider |
| hom-sem  | person, bicycle, bus | car, truck, train<br>car, truck, train, motor<br>car, truck, train, motor, rider              |
| freq-dec | person, car, rider   | bicycle, train, truck<br>bicycle, train, truck, motor<br>bicycle, train, truck, motor, bus    |
| freq-inc | motor, truck, bus    | person, train, car<br>person, train, car, bicycle<br>person, train, car, bicycle, rider       |

inc) in Table 2. We observe that CAT achieves  $\text{mAP}_k$  scores of 6.05% (9.92%), 6.08% (10.87%), and 8.65% (11.04%) under the hom-sem setting, all of which are lower than those of D-DETR. In contrast, the proposed ASGS demonstrates substantial improvements, with  $\text{mAP}_k$  scores of 10.41%, 12.69%, and 12.23%, significantly outperforming the baseline methods. Although in some settings, our  $\text{AR}_u$  is slightly lower than PROB (e.g., in the hom-sem setting with 3 unknown classes, PROB’s  $\text{AR}_u$  exceeds ASGS’s by 0.31%), our other metrics have shown significant improvements, particularly  $\text{mAP}_k$ , which increased by 4.52%. These results indicate that our model effectively addresses the SG-OSOD setting, achieving a well-balanced detection performance for both known and unknown classes.

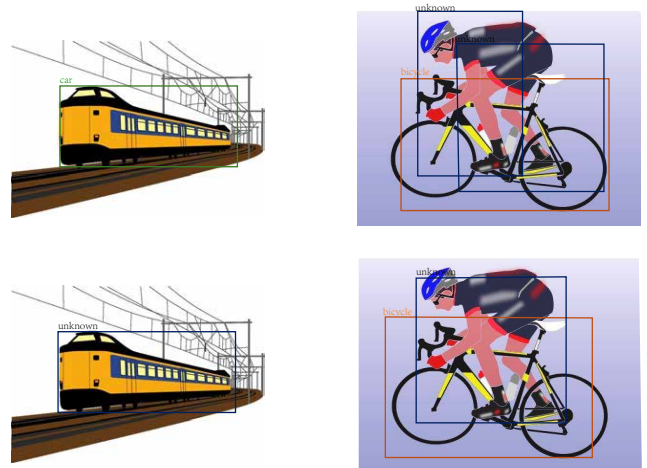

Figure 1. Qualitative comparisons on Pascal VOC  $\rightarrow$  Clipart between OW-DETR (top) and ASGS (bottom).

Table 2. Results on Cityscapes → BDD100k dataset under different task settings.

| Task     | Method               | num.unknown-class: 3 |                   |              |              | num.unknown-class: 4 |                   |              |              | num.unknown-class: 5 |                   |              |              |
|----------|----------------------|----------------------|-------------------|--------------|--------------|----------------------|-------------------|--------------|--------------|----------------------|-------------------|--------------|--------------|
|          |                      | mAP <sub>k</sub> ↑   | AR <sub>u</sub> ↑ | WI↓          | AOSE↓        | mAP <sub>k</sub> ↑   | AR <sub>u</sub> ↑ | WI↓          | AOSE↓        | mAP <sub>k</sub> ↑   | AR <sub>u</sub> ↑ | WI↓          | AOSE↓        |
| hom-sem  | D-DETR(ICLR'21) [1]  | 9.92                 | 0.00              | 4.723        | 26612        | 10.87                | 0.00              | 3.869        | 22031        | 11.04                | 0.00              | 3.992        | 30074        |
|          | OpenDet(CVPR'22) [3] | 8.81                 | 4.11              | 4.214        | 18829        | 12.48                | 4.51              | 4.490        | 17921        | 11.35                | 4.29              | 4.241        | 24690        |
|          | OW-DETR(CVPR'22) [2] | 8.62                 | 4.45              | 4.441        | 17602        | 11.20                | 4.47              | 4.467        | 18134        | 11.49                | 4.63              | 4.723        | 20742        |
|          | PROB(CVPR'23) [8]    | 5.89                 | <b>7.12</b>       | 3.768        | 15661        | 5.53                 | 6.44              | 3.800        | 15861        | 9.82                 | 6.47              | 4.007        | 17349        |
|          | CAT(CVPR'23) [6]     | 6.05                 | 5.77              | 3.997        | 15692        | 6.08                 | 5.81              | 4.021        | 16170        | 8.65                 | 5.88              | 4.229        | 18450        |
|          | ASGS (ours)          | <b>10.41</b>         | 6.81              | <b>3.326</b> | <b>10281</b> | <b>12.69</b>         | <b>6.75</b>       | <b>3.512</b> | <b>15576</b> | <b>12.23</b>         | <b>6.91</b>       | <b>3.613</b> | <b>16878</b> |
| freq-dec | D-DETR(ICLR'21) [1]  | 14.43                | 0.00              | 0.855        | 7090         | 14.44                | 0.00              | 0.904        | 7846         | 14.47                | 0.00              | 1.240        | 12888        |
|          | OpenDet(CVPR'22) [3] | 14.81                | 10.66             | 0.946        | 4276         | 15.03                | 9.91              | 1.120        | 4978         | 15.02                | 12.11             | 1.286        | 7918         |
|          | OW-DETR(CVPR'22) [2] | 15.10                | 10.29             | 0.979        | 4236         | 14.97                | 9.86              | 1.040        | 4706         | 14.98                | 9.98              | 1.390        | 7640         |
|          | PROB(CVPR'23) [8]    | 13.07                | <b>11.89</b>      | 0.721        | 3403         | 11.95                | <b>14.32</b>      | 0.987        | 4488         | 14.01                | <b>14.62</b>      | 1.082        | 6987         |
|          | CAT(CVPR'23) [6]     | 13.97                | 10.96             | 0.742        | 3302         | 13.07                | 12.13             | 1.021        | 4012         | 14.66                | 13.31             | 1.129        | 7013         |
|          | ASGS (ours)          | <b>15.28</b>         | 11.23             | <b>0.705</b> | <b>3231</b>  | <b>16.60</b>         | 13.17             | 0.706        | <b>3709</b>  | <b>16.21</b>         | 13.88             | <b>1.010</b> | <b>6677</b>  |
| freq-inc | D-DETR(ICLR'21) [1]  | 10.85                | 0.00              | 3.264        | 29484        | 10.87                | 0.00              | 3.28         | 30266        | 11.11                | 0.00              | 3.416        | 33910        |
|          | OpenDet(CVPR'22) [3] | 10.47                | 3.42              | 5.591        | 21392        | 10.42                | 3.60              | 5.981        | 21768        | 10.58                | 3.57              | 6.023        | 25501        |
|          | OW-DETR(CVPR'22) [2] | 10.00                | 3.65              | 5.412        | 19732        | 9.99                 | 3.65              | 5.469        | 20632        | 10.03                | 3.62              | 5.521        | 22430        |
|          | PROB(CVPR'23) [8]    | 6.98                 | 8.12              | <b>3.380</b> | 16129        | 7.01                 | <b>7.12</b>       | 4.012        | 17099        | 6.58                 | 7.42              | 4.128        | 18794        |
|          | CAT(CVPR'23) [6]     | 8.16                 | 5.07              | 3.804        | 15810        | 8.26                 | 5.11              | <b>3.836</b> | 16306        | 8.76                 | 5.17              | 4.025        | <b>18612</b> |
|          | ASGS (ours)          | <b>11.07</b>         | <b>8.21</b>       | 3.421        | <b>15538</b> | <b>11.37</b>         | 6.47              | 3.938        | <b>16038</b> | <b>12.27</b>         | <b>7.61</b>       | <b>4.013</b> | 19864        |

## 2.2. Qualitative Comparison

The visualization results in Figure 1 demonstrate a clear performance advantage of ASGS over OW-DETR [2] on the Pascal VOC → Clipart datasets. Our proposed model exhibits two key strengths: effective detection of unknown samples and superior bounding box regression accuracy for both known and unknown classes.

Further qualitative comparisons between (a) OW-DETR and (b) ASGS are presented in Figures 2,3 and 4. These figures highlight ASGS's consistent performance across scenarios with varying numbers of unknown classes. In each case, our model maintains robust unknown sample detection while delivering precise bounding box regression for all object categories.

## References

- [1] Nicolas Carion, Francisco Massa, Gabriel Synnaeve, Nicolas Usunier, Alexander Kirillov, and Sergey Zagoruyko. End-to-end object detection with transformers. In *European conference on computer vision*, pages 213–229. Springer, 2020. 2
- [2] Akshita Gupta, Sanath Narayan, KJ Joseph, Salman Khan, Fahad Shahbaz Khan, and Mubarak Shah. Ow-detr: Open-world detection transformer. In *Proceedings of the IEEE/CVF conference on computer vision and pattern recognition*, pages 9235–9244, 2022. 1, 2
- [3] Jiaming Han, Yuqiang Ren, Jian Ding, Xingjia Pan, Ke Yan, and Gui-Song Xia. Expanding low-density latent regions for open-set object detection. In *Proceedings of the IEEE/CVF Conference on Computer Vision and Pattern Recognition*, pages 9591–9600, 2022. 1, 2
- [4] KJ Joseph, Salman Khan, Fahad Shahbaz Khan, and Vineeth N Balasubramanian. Towards open world object detec-

tion. In *Proceedings of the IEEE/CVF conference on computer vision and pattern recognition*, pages 5830–5840, 2021. 1

- [5] Wuyang Li, Xiaoqing Guo, and Yixuan Yuan. Novel scenes & classes: Towards adaptive open-set object detection. In *Proceedings of the IEEE/CVF International Conference on Computer Vision*, pages 15780–15790, 2023. 1
- [6] Shuailei Ma, Yuefeng Wang, Ying Wei, Jiaqi Fan, Thomas H Li, Hongli Liu, and Fanbing Lv. Cat: Localization and identification cascade detection transformer for open-world object detection. In *Proceedings of the IEEE/CVF Conference on Computer Vision and Pattern Recognition*, pages 19681–19690, 2023. 2
- [7] Sagar Vaze, Kai Han, Andrea Vedaldi, and Andrew Zisserman. Open-set recognition: A good closed-set classifier is all you need? 2021. 1
- [8] Orr Zohar, Kuan-Chieh Wang, and Serena Yeung. Prob: Probabilistic objectness for open world object detection. In *Proceedings of the IEEE/CVF Conference on Computer Vision and Pattern Recognition*, pages 11444–11453, 2023. 2



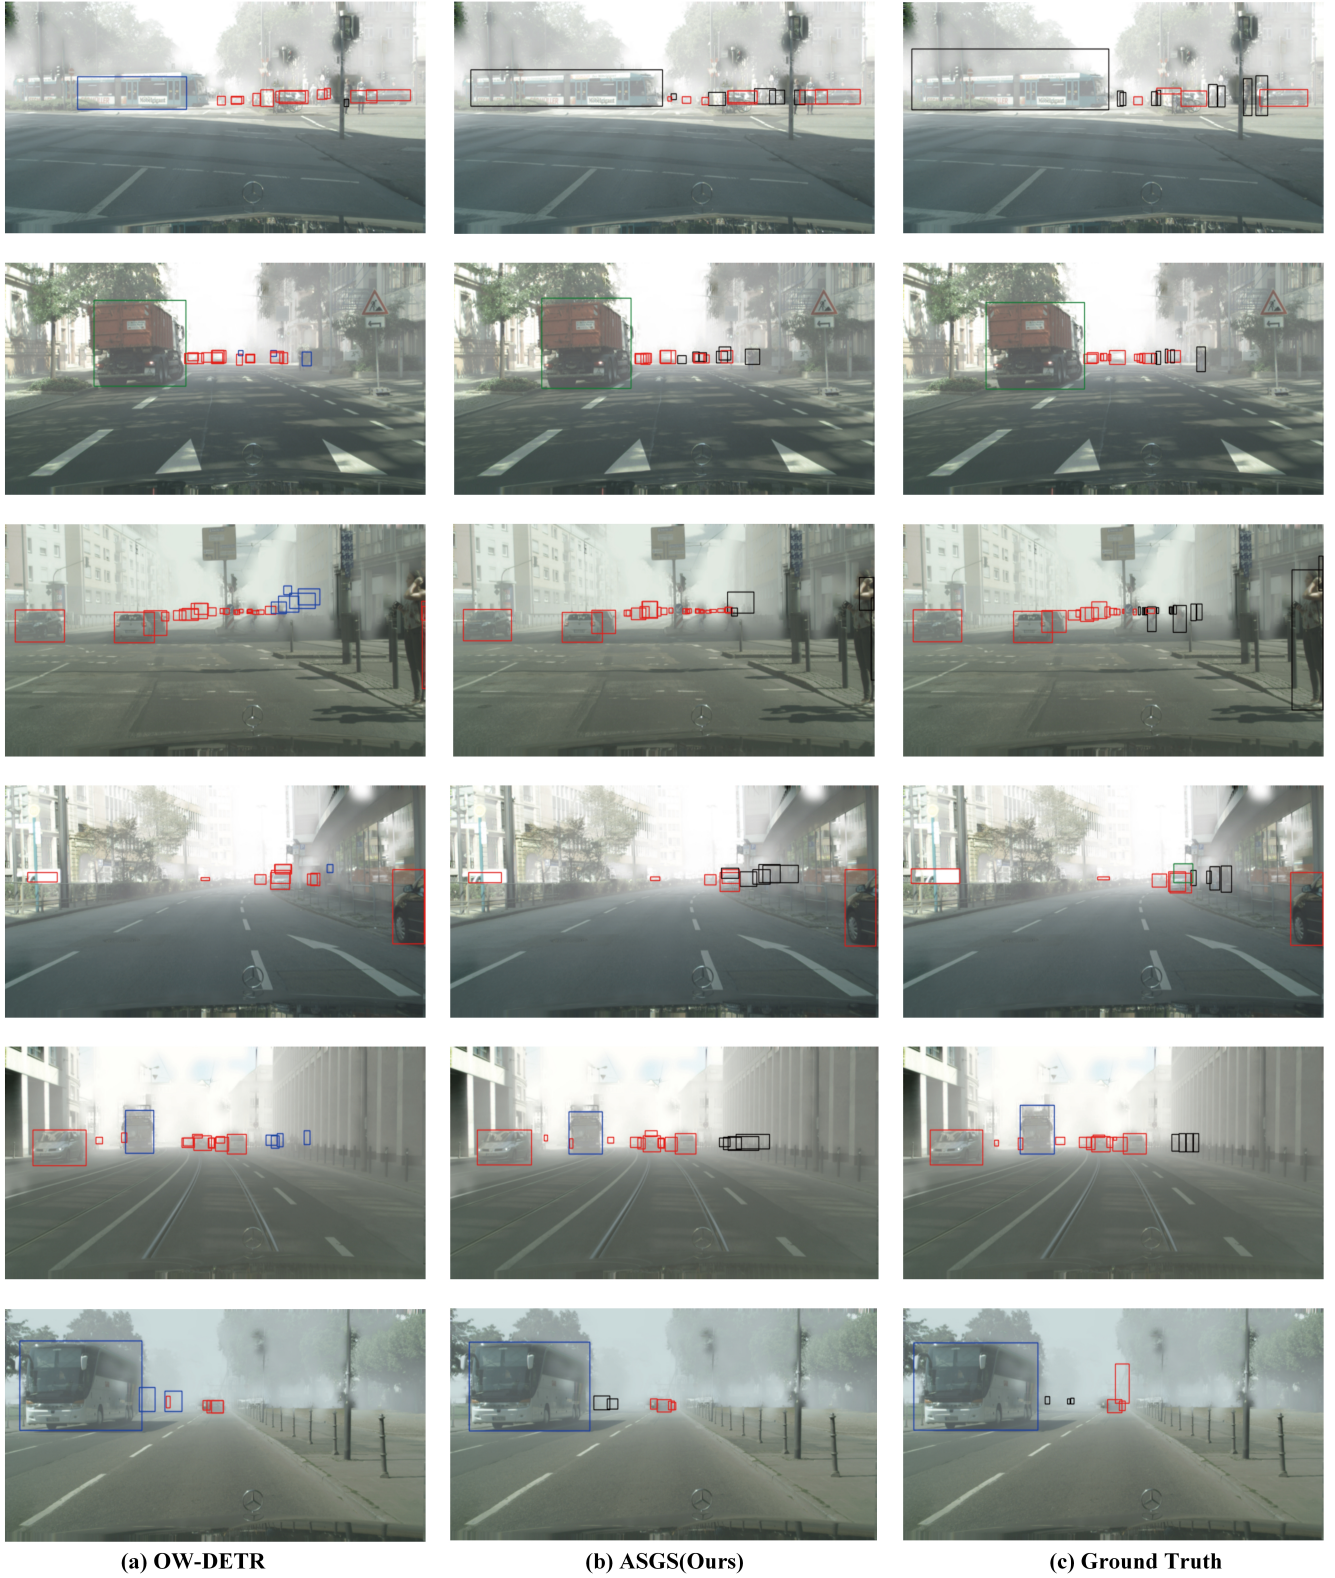

Figure 2. Qualitative comparison on Cityscapes  $\rightarrow$  Foggy Cityscapes under het-sem setting between (a) OW-DETR and (b) ASGS, the number of unknown classes is 3. The red, blue, green, and black boxes represent the car, bus, truck, and unknown classes.



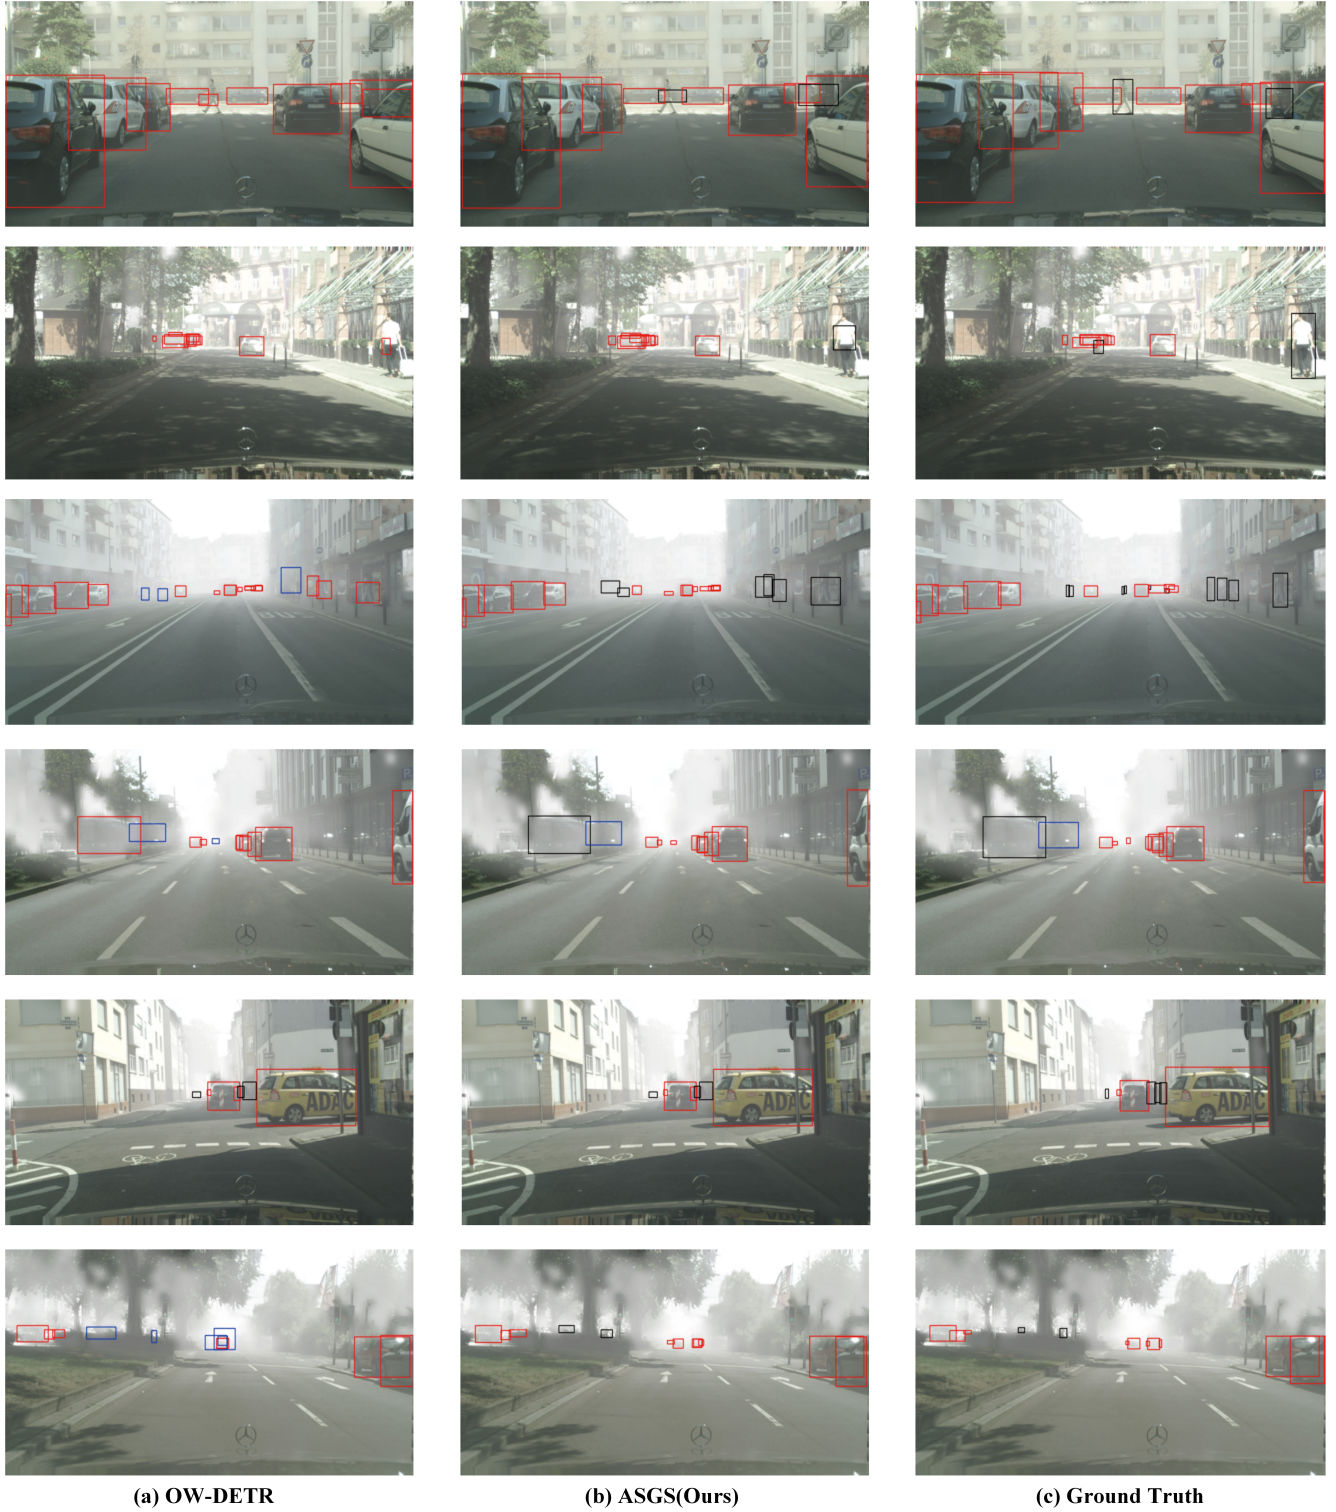

Figure 3. Qualitative comparison on Cityscapes  $\rightarrow$  Foggy Cityscapes under het-sem setting between (a) OW-DETR and (b) ASGS, the number of unknown classes is 4. The red, blue, green, and black boxes represent the car, bus, truck, and unknown classes.

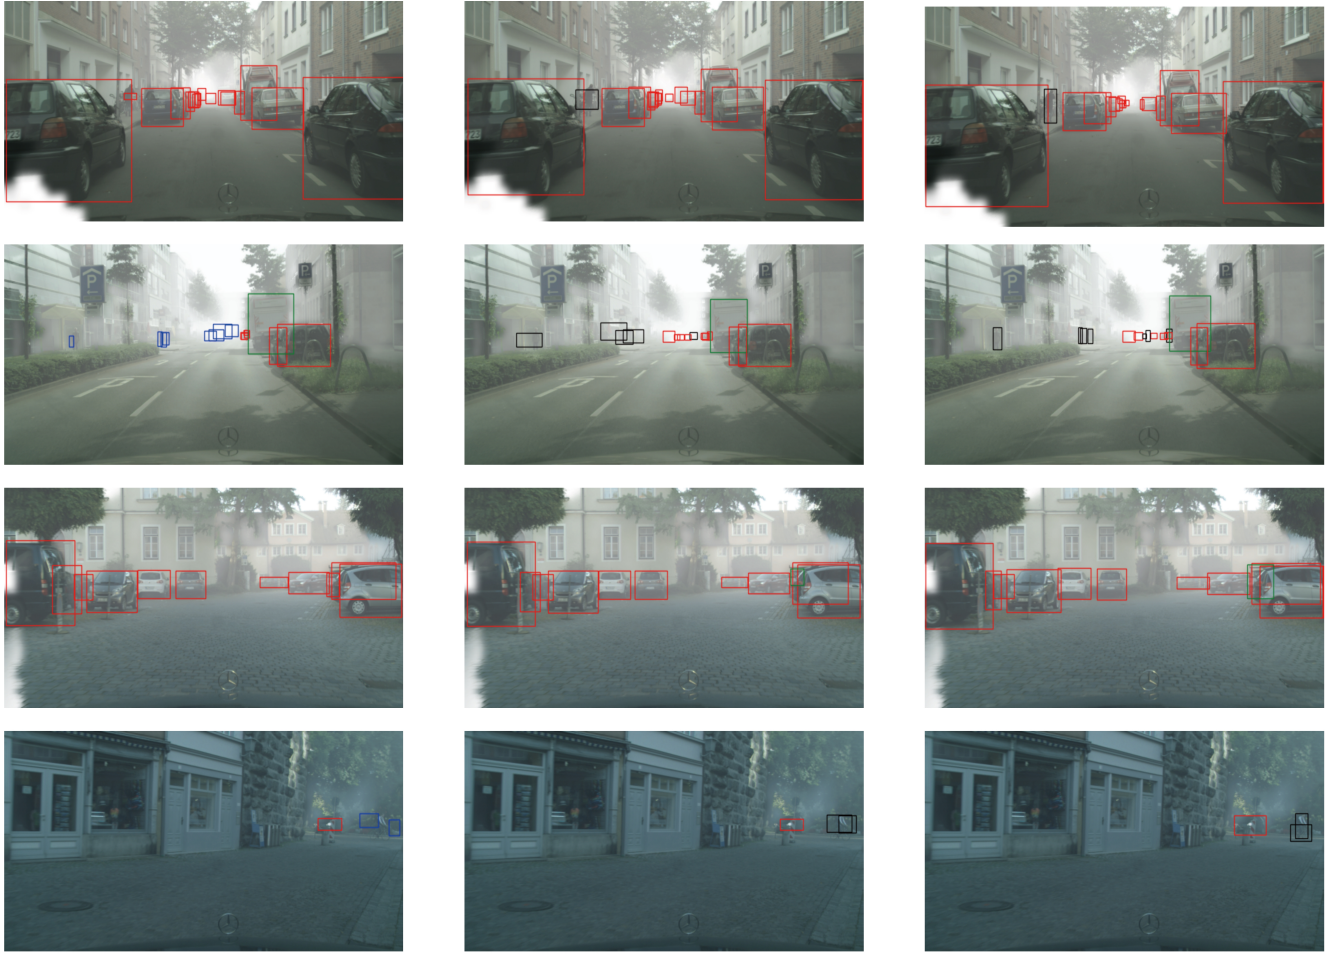

(a) OW-DETR

(b) ASGS(Ours)

(c) Ground Truth

Figure 4. Qualitative comparison on Cityscapes  $\rightarrow$  Foggy Cityscapes under het-sem setting between (a) OW-DETR and (b) ASGS, the number of unknown classes is 5. The red, blue, green, and black boxes represent the car, bus, truck, and unknown classes.
